# Supplementary material for: Scientific discovery in a model-centric framework: Reproducibility, innovation, and epistemic diversity
Source: PubMed Central journal article supplement (PMC6519896; doi:10.1371/journal.pone.0216125), 2019-05-15
Supplement: pone.0216125.s001.pdf [file pone.0216125.s001.pdf]

### Agent-based model algorithm.

We first present the general algorithm for stochastic process of scientific discovery with replicator in the agent-based model and then discuss specific values used in the article.

- 1: Input:  $\mathcal{M}, \Theta, S, \mathcal{R}, \mathbb{P}(R_a), \mathbb{P}(M|R_a, M_G^{(t)}), M_G^{(0)}, M_T, \theta_T, n, t_{max}$
- 2: Set  $t = 0$
- 3: **while**  $t < t_{max}$  **do**
- 4:   Simulate  $R_a \sim \text{Categorical}(p_1, p_2, \dots, p_A)$
- 5:   Simulate  $M_P^{(t)} \sim \mathbb{P}(M|R_a, M_G^{(t)})$
- 6:   Simulate  $D_i^{(t)} \sim M_T(\theta_T)$ , for  $i = 1, 2, \dots, n$  independently of each other
- 7:   Calculate

$$S(M_P^{(t)}) - S(M_G^{(t)}) = C + \sum_{i=1}^n \log \mathbb{P}(D_i^{(t)}|\hat{\theta}, M_P^{(t)}) - \sum_{i=1}^n \log \mathbb{P}(D_i^{(t)}|\hat{\theta}, M_G^{(t)}),$$

where,  $C = 2p \log(n)$  if SC, or  $C = 2p$  if AIC, and  $\hat{\theta}$  is the maximum likelihood estimate of  $\theta$

- 8:   **if**  $S(M_P^{(t)}) < S(M_G^{(t)})$ , **then**
- 9:     Set  $M_G^{(t+1)} = M_P^{(t)}$ ,
- 10:   **else**
- 11:     Set  $M_G^{(t+1)} = M_G^{(t)}$
- 12:   **end if**
- 13:   Set  $t = t + 1$
- 14: **end while**

We choose  $M_G^{(0)}$  randomly with equal probability from models in  $\mathcal{M}$ .  $\Theta$  determines  $\theta_{min}, \theta_{max}$  and  $\theta_T$  is chosen uniformly randomly on this interval. The parameters of the categorical distribution used in step 4 is determined by the proportion of scientists in the population.
