# Supplementary material for: Scientific discovery in a model-centric framework: Reproducibility, innovation, and epistemic diversity
Source: PubMed Central journal article supplement (PMC6519896; doi:10.1371/journal.pone.0216125), 2019-05-15
Supplement: pone.0216125.s002.pdf [file pone.0216125.s002.pdf]

## **Code and Data.**

The code to perform the simulations and analyze the data generated in this project, and a summary data set are included as a Git repository at <https://github.com/gnardin/CRUST>. Refer to the description in the main page of this repository for further instructions and details of the implementation.
