# Supplementary material for: Scientific discovery in a model-centric framework: Reproducibility, innovation, and epistemic diversity
Source: PubMed Central journal article supplement (PMC6519896; doi:10.1371/journal.pone.0216125), 2019-05-15
Supplement: pone.0216125.s019.pdf [file pone.0216125.s019.pdf]

## A stochastic process of scientific discovery.

Consider an infinite population of scientists conducting a sequence of idealized experiments  $\xi^{(t)} := (M_P^{(t)}, \theta, D^{(t)}, S, K^{(t)})$ , indexed by time  $t = 1, 2, \dots$  where  $M_P^{(t)}$  belongs to a set of probability structures  $\mathcal{M} = \{M_1, M_2, \dots, M_L\}$  known to all scientists. Further, assume that there are  $A$  distinct scientist types in the population, each with a well-defined research strategy  $R \in \mathcal{R} = \{R_o, R_1, \dots, R_A\}$  of proposing a model in their experiment. These strategies depend on the type of scientist and a global model  $M_G^{(t)} \in \mathcal{M}, K^{(t)}$ , which represents the consensus of the scientist population at time  $t$ . The population of scientists aims to find the true model  $M_T \in \mathcal{M}$ . A scientist selected to conduct an experiment at time  $t$ , uses her background knowledge  $K^{(t)}$  to propose a new candidate model  $M_P^{(t)}$ . Specifically, we define  $K^{(t)}$  as a probability distribution  $\mathbb{P}(M_P|R^{(t)}, M_G^{(t)})$ , where  $\{M_P, M_G^{(t)}\} \in \mathcal{M}^2$ , and  $R^{(t)} \in \mathcal{R}$ .

The initial conditions of our stochastic process include the true model  $M_T$ , true parameter values  $\theta_T$  of  $M_T$ , an initial global model  $M_G^{(0)}$ , a method for model selection  $S$ , and the sample size of the data  $n$ . At each time step, an idealized experiment  $\xi^{(t)}$  is performed and new data  $D^{(t)}$  of size  $n$  is generated independent of everything else from distribution  $M_T(\theta_T)$ . Each experiment is performed by a scientist randomly selected from  $A$  types in the population using the categorical distribution with probabilities  $(p_1, p_2, \dots, p_A)$ . The selected scientist proposes a model  $M_P^{(t)}$  with probability  $\mathbb{P}(M_P|R^{(t)}, M_G^{(t)})$  conditional on a research strategy fully specified by her type and the current global model. Given the data  $D^{(t)}$ , model scores under the proposed model and the current global model are calculated as  $S(M_P^{(t)})$  and  $S(M_G^{(t)})$ , respectively. The model with favorable score (i.e., smaller for both AIC and SC) is set as the new global model  $M_G^{(t+1)}$ . This mechanism represents how scientific consensus is updated in light of new evidence.

A defining property of our stochastic process with no replication is that  $K^{(t)}$  depends only on quantities at time  $t$ . If  $R_a \in \mathcal{R}$  depends only on  $M_G^{(t)}$  for all  $a$ , the transition from  $M_G^{(t)}$  to  $M_G^{(t+1)}$  admits the Markov property and the stochastic process representing the scientific process is a Markov chain with transition probabilities given by

$$\mathbb{P}(M_G^{(t+1)} = M_\ell | M_G^{(t)} = M_i) = \sum_{a=1}^A \mathbb{P}(S(M_\ell) < S(M_i)) \mathbb{P}(M_\ell | R_a, M_i) \mathbb{P}(R_a). \quad (1)$$

On the right hand side of Eq. (1), the last term is the probability of selecting a scientist with research strategy  $R_a$  independent of all else, the middle term is the

probability of proposing the model  $M_\ell$  given the current global model  $M_i$  and the scientist type  $a$  with research strategy  $R_a$  selected. The probability  $\mathbb{P}(S(M_\ell) < S(M_i))$  depends on  $M_T$  via  $D^{(t)}$  generated and it is obtained by  $\int_{\Theta} \int_{\mathcal{D}} \mathbb{P}(S(M_\ell) < S(M_i)|D)\mathbb{P}(D|\theta)\mathbb{P}(\theta)dDd\theta$ , where  $\mathbb{P}(\theta)$  is the probability of parameter,  $\mathbb{P}(D|\theta)$  is the likelihood of the data, and  $\mathbb{P}(S(M_\ell) < S(M_i)|D)$  is the probability that the proposed model  $M_\ell$  has a more favorable score than  $M_i$  conditional on data. We have  $\mathbb{P}(S(M_\ell) = S(M_i)) = 1$  when  $\ell = i$  and the model selection method  $S$  is a continuous variable so that  $\mathbb{P}(S(M_\ell) \leq S(M_i)) = \mathbb{P}(S(M_\ell) < S(M_i))$  and by convention we set  $\mathbb{P}(S(M_\ell) < S(M_i)) = 1$ . Further,  $\mathbb{P}(M_\ell|R_a, M_i) > 0$  for all  $a, i, \ell$  so that transition probabilities are nonzero for all models and scientist types. This second condition guarantees that our Markov chain is ergodic, which implies that it has a unique stationary distribution—its limiting distribution for visiting a model.

When there are no replication experiments in the system,  $K^{(t)}$  is defined as  $\mathbb{P}(M_P|R^{(t)}, M_G^{(t)})$  which states that conditional on  $R^{(t)}$  and  $M_G^{(t)}$ , the probability of proposing a model is independent of the past time steps. Let  $R_o \in \mathcal{R}$  be the replicator strategy. Given the proposed and global models at time  $t - 1$ , the replicator strategy at time  $t$ ,  $R_o^{(t)}$ , is to perform an experiment at time  $t$ , using the exact same proposed and global models as those at time  $t - 1$ , but with new data  $D^{(t)}$  generated under  $M_T(\theta_T)$ . Since  $R_o \in \mathcal{R}$  depends on  $M_G^{(t-1)}$ , the transition from  $M_G^{(t)}$  to  $M_G^{(t+1)}$  does not admit the Markov property anymore and the stochastic process representing the scientific process is a higher order Markov chain. The transition probabilities of the Markov chain at time  $t$  can be expressed by conditioning on whether a scientist chosen at a given time is a replicator:

$$\begin{aligned} & \mathbb{P}(R^{(t)} \neq R_o)\mathbb{P}(M_G^{(t+1)}|M_G^{(t)}) + \\ & \mathbb{P}(R^{(t)} = R_o)[\mathbb{P}(R^{(t-1)} \neq R_o)\mathbb{P}(M_G^{(t+1)}|M_G^{(t)}, M_G^{(t-1)}) + \dots + \\ & \mathbb{P}(R^{(1)} = R_o)[\mathbb{P}(R^{(0)} \neq R_o)\mathbb{P}(M_G^{(t+1)}|M_G^{(t)}, M_G^{(t-1)}, \dots, M_G^{(0)})] \dots]. \end{aligned} \quad (2)$$

In Eq. (2), the first term in the sum is the joint probability of choosing a scientist who is not a replicator at time  $t$  and the transition probability from global model at time  $t$  to global model at time  $t + 1$ . Since the scientists are chosen independently of all else, the joint probability is written as the product of choosing a scientist who is not a replicator at time  $t$ , given by  $\mathbb{P}(R^{(t)} \neq R_o)$ , and the probability of transition to the global model at time  $t + 1$  is given by Eq. (1). The second term in the sum is the joint probability of choosing a scientist who is a replicator at time  $t$  and the transition probabilities to a model. We write the second term as the product of  $\mathbb{P}(R^{(t)} = R_o)$  and the transition probabilities when a replicator is chosen. If the scientist at time  $t$  is a replicator, she replicates the experiment at time

step  $t - 1$ , which might be a replication experiment itself. Therefore, the transition probabilities to a model within the first brackets is a sum of two probabilities. The first term is the joint probability of choosing a scientist who is not a replicator and the transition probability in that case, and the second term is the probability of choosing a replicator given by  $\mathbb{P}(R^{(t-1)} = R_o)$  at time step  $t - 1$ , and the transition probability in that case. This is a recursive equation, in the sense that the transition probabilities at time  $t$  depend on the transition probabilities at time  $t - 1$ . An implication is that the transition probabilities at time  $t$  are path dependent. Therefore, when a replicator scientist is included in the population, we have a higher order Markov chain, whose long term dynamics are feasible to obtain with a forward simulation method.

For the process with replicator, we lift the assumption  $\mathbb{P}(M_\ell | R_a, M_i) > 0$  for all  $a, i, \ell$  that we imposed in the process without a replicator. This assumption increases the connectivity of the transition probability matrix, which makes calculations in the long-term behavior of the Markov chain straightforward. Due to our new process not admitting the Markov property, these calculations are irrelevant in the analysis of the process with a replicator. Therefore, we drop the assumption of transitioning from a model to any other model to be nonzero. Removing this assumption allows us to define scientist types that visit only the subset of all models consistent with a specific research strategy. This property of the process renders the effects of each research strategy on the process outcomes well-pronounced.
