# Supplementary material for: Scientific discovery in a model-centric framework: Reproducibility, innovation, and epistemic diversity
Source: PubMed Central journal article supplement (PMC6519896; doi:10.1371/journal.pone.0216125), 2019-05-15
Supplement: pone.0216125.s020.pdf [file pone.0216125.s020.pdf]

## Description of example system of linear models.

We define  $\mathcal{M}$ , the family of linear models as

$$\{\mathbf{y} = \mathbf{X}\boldsymbol{\beta} + \boldsymbol{\epsilon} \mid \beta_{i\dots jv} \neq 0 \Rightarrow (\beta_i \neq 0, \dots, \beta_v \neq 0, \dots, \beta_{i\dots j} \neq 0)\}.$$

Here,  $\mathbf{y}$  is  $n \times 1$  vector of response variables,  $\mathbf{X}$  is  $n \times p$  matrix of predictor variables,  $\boldsymbol{\beta}$  is  $p \times 1$  vector of model parameters, and  $\boldsymbol{\epsilon}$  is  $n \times 1$  vector of random errors satisfying the Gauss-Markov conditions  $\mathbb{E}(\epsilon_i) = 0$ ,  $\text{Var}(\epsilon_i) = \sigma^2$ , and  $\text{Cov}(\epsilon_i, \epsilon_j) = 0$  for all  $i, j$ .  $\mathcal{M}$  contains  $L$  linear models with up to  $k$  factors subject to the constraint  $\beta_{i\dots jv} \neq 0 \Rightarrow (\beta_i \neq 0, \dots, \beta_{i\dots j} \neq 0)$  which guarantees that if a model contains a  $v$ -way ( $v \leq k$ ) interaction term of  $v$  factors in the model, then all  $(v - 1)$ -way,  $(v - 2)$ -way,  $\dots$ , 2-way interactions of those factors and their main effects are included in the model. We include the predictor  $x_1$  and the response variable  $y$  in all models reflecting our assumption that all scientists in the community focus on a research question that involves at least one common factor of interest and a common response variable. Let  $M_i \in \mathcal{M}$  be a model with  $p_i$  parameters of which  $v_{\ell_i}$  is the highest order interaction term with order  $\ell_i$  denoting the order,  $\#v_{\ell_i}$  is the cardinality of  $v_{\ell_i}$ . Let  $M_i \succ M_j$  denote that  $M_i$  is more complex than  $M_j$ . We define the *model complexity* as a partial ordering obeying three conditions:

1. If  $p_i > p_j$  then  $M_i \succ M_j$ .
2. If  $p_i = p_j$  and  $\ell_i > \ell_j$ , then  $M_i \succ M_j$ .
3. If  $p_i = p_j$ ,  $\ell_i = \ell_j$ , and  $\#v_{\ell_i} > \#v_{\ell_j}$ , then  $M_i \succ M_j$ .

Otherwise, we say that complexities of  $M_i$  and  $M_j$  are indistinguishable.
