# Supplementary material for: Scientific discovery in a model-centric framework: Reproducibility, innovation, and epistemic diversity
Source: PubMed Central journal article supplement (PMC6519896; doi:10.1371/journal.pone.0216125), 2019-05-15
Supplement: pone.0216125.s023.pdf [file pone.0216125.s023.pdf]

### Monte Carlo estimates of model comparisons.

Let  $\mathbf{y}$  denote  $n \times 1$  vector of responses generated by the true model and  $\mathbf{X}$  be  $n \times p$  matrix of predictors, where  $p$  is the number of parameters in the fitted model. Under the Gauss-Markov assumptions  $\mathbb{E}(\epsilon_i) = 0$ ,  $Var(\epsilon_i) = \sigma^2$ ,  $Cov(\epsilon_i, \epsilon_j)$  for all  $i, j$  we denote the vector of joint maximum likelihood estimates for the regression coefficients by  $\hat{\boldsymbol{\beta}}$ . By definition of Schwarz Criterion

$$S(M) = 2p \log(n) - 2 \log \mathbb{P}(\mathbf{y}|\mathbf{X}, \hat{\boldsymbol{\beta}}).$$

If Akaike's Information Criterion is used,  $2p$  replaces  $2p \log(n)$ . The loglikelihood in the second term is equal to  $n$  times the log of the residual sums of squares and it can be written as

$$\log \mathbb{P}(\mathbf{y}|\mathbf{X}, \hat{\boldsymbol{\beta}}) = n \log(\mathbf{y}'\mathbf{y} - \mathbf{y}'\mathbf{X}(\mathbf{X}'\mathbf{X})^{-1}\mathbf{X}'\mathbf{y}) + C,$$

where  $C$  is a term dependent only on  $M_T$ . For transition probabilities, we are interested in  $\mathbb{P}(S(M_i) < S(M_j))$ . We have

$$\begin{aligned} S(M_i) - S(M_j) &= (p_i - p_j) \log(n) + n \log(\mathbf{y}'\mathbf{X}_i(\mathbf{X}'_i\mathbf{X}_i)^{-1}\mathbf{X}'_i\mathbf{y}) \\ &\quad - n \log(\mathbf{y}'\mathbf{X}_j(\mathbf{X}'_j\mathbf{X}_j)^{-1}\mathbf{X}'_j\mathbf{y}), \end{aligned} \quad (1)$$

where subscripts  $i, j$  now denote quantities that depend on model  $M_i$  and  $M_j$ . The random variable  $\mathbf{I}_{\{S(M_i) - S(M_j) < 0 | M_T\}}$  is Bernoulli distributed with probability of success  $\mathbb{P}(S(M_i) - S(M_j) < 0)$  which is equal to its expectation  $\mathbb{E}(\mathbf{I}_{\{S(M_i) - S(M_j) < 0 | M_T\}})$  whose Monte Carlo estimate is given by

$$\widehat{\mathbb{E}}(\mathbf{I}_{\{S(M_i) - S(M_j) < 0 | M_T\}}) = \frac{1}{V} \sum_{v=1}^V \mathbf{I}_{\{S(M_i) - S(M_j) < 0 | \mathbf{y}_v\}}. \quad (2)$$

An estimate of  $\mathbb{P}(S(M_i) - S(M_j) < 0)$  is obtained using Eq. (2) conditional on true model  $M_T$  and its predictors  $X_T$  as follows. First, generate the set of  $k$  predictor variables and build  $\mathbf{X}_i$  and  $\mathbf{X}_j$  for  $M_i$  and  $M_j$  respectively. Then generate  $\boldsymbol{\beta}_{T_v}$ ,  $v = 1, 2, \dots, V$  independently of each other. Finally, simulate  $\mathbf{y}_v | \mathbf{X}_T, \boldsymbol{\beta}_{T_v}$  from the normal distribution with expected value  $\mathbb{E}(\mathbf{y}_v) = \mathbf{X}_T \boldsymbol{\beta}_{T_v}$  and variance  $\sigma^2$ . Each realization  $(\mathbf{y}_1, \mathbf{y}_2, \dots, \mathbf{y}_v)$  is used in Eq. (1) to assess  $S(M_i) - S(M_j) < 0$  and the estimate is obtained using the mean in Eq. (2).
