# Supplementary material for: Scientific discovery in a model-centric framework: Reproducibility, innovation, and epistemic diversity
Source: PubMed Central journal article supplement (PMC6519896; doi:10.1371/journal.pone.0216125), 2019-05-15
Supplement: pone.0216125.s026.pdf [file pone.0216125.s026.pdf]

**Populations of scientists with varying proportions of scientist types.**

| Scenario           | Population    | Rey   | Mave  | Tess  | Bo    |
|--------------------|---------------|-------|-------|-------|-------|
| Without Replicator | Tess Dominant | 0     | 0.005 | 0.99  | 0.005 |
|                    | Mave Dominant | 0     | 0.99  | 0.005 | 0.005 |
|                    | Bo Dominant   | 0     | 0.005 | 0.005 | 0.99  |
|                    | All Equal     | 0     | 0.3   | 0.3   | 0.3   |
| With Replicator    | Rey Dominant  | 0.99  | 0.003 | 0.003 | 0.003 |
|                    | Tess Dominant | 0.003 | 0.003 | 0.99  | 0.003 |
|                    | Mave Dominant | 0.003 | 0.99  | 0.003 | 0.003 |
|                    | Bo Dominant   | 0.003 | 0.003 | 0.003 | 0.99  |
|                    | All Equal     | 0.25  | 0.25  | 0.25  | 0.25  |
