# Supplementary material for: Scientific discovery in a model-centric framework: Reproducibility, innovation, and epistemic diversity
Source: PubMed Central journal article supplement (PMC6519896; doi:10.1371/journal.pone.0216125), 2019-05-15
Supplement: pone.0216125.s027.pdf [file pone.0216125.s027.pdf]

### Parameter values used in ABM experiment.

| Parameter    | Value                                                                     |
|--------------|---------------------------------------------------------------------------|
| replications | 100                                                                       |
| timesteps    | 11000                                                                     |
| k            | 3                                                                         |
| sigma        | 0.2, 0.5 and 0.8                                                          |
| sampleSize   | 100                                                                       |
| trueModel    | x1 + x2,<br>x1 + x2 + x3 + x1x2, and<br>x1 + x2 + x3 + x1x2 + x1x3 + x2x3 |
| correlation  | 0.2                                                                       |
| nRey         | 1 and 300                                                                 |
| nTess        | 1 and 300                                                                 |
| nBo          | 1 and 300                                                                 |
| nMave        | 1 and 300                                                                 |
| modelCompare | AIC and BIC                                                               |
| ndec         | 4                                                                         |
