# Supplementary material for: Scientific discovery in a model-centric framework: Reproducibility, innovation, and epistemic diversity
Source: PubMed Central journal article supplement (PMC6519896; doi:10.1371/journal.pone.0216125), 2019-05-15
Supplement: pone.0216125.s028.pdf [file pone.0216125.s028.pdf]

**Correlations per scientist population.**

| $r_{SR}$                              | Overall | Rey  | Tess  | Mave  | Bo    | All equal |
|---------------------------------------|---------|------|-------|-------|-------|-----------|
| Time spent at true model              | -0.02   | 0.41 | 0.35  | 0.69  | -0.06 | 0.59      |
| Mean first passage time to true model | 0.26    | 0.03 | 0.023 | -0.13 | 0.03  | -0.06     |
| Stickiness                            | 0.55    | 0.74 | 0.87  | 0.76  | -0.03 | 0.82      |
